# Supplementary material for: Predicting intrinsic antiferromagnetic and ferroelastic MnF4 monolayer with controllable magnetization
Source: Royal Society of Chemistry journal article supplement (doi:10.1039/d1tc04705a), 2021-01-01
Supplement: d1tc04705a1.pdf [file d1tc04705a1.pdf]

## Predicting Intrinsic Antiferromagnetic and Ferroelastic MnF<sub>4</sub> monolayer with Controllable Magnetization

Shaowen Xu<sup>a</sup>, Fanhao Jia<sup>a,b†</sup>, Xuli Cheng<sup>a</sup>, and Wei Ren<sup>b\*</sup>

<sup>a</sup>Department of Physics, Shanghai Key Laboratory of High Temperature Superconductors, International Centre of Quantum and Molecular Structures, Shanghai University, Shanghai 200444, China

<sup>b</sup>School of Materials Science and Engineering, Shanghai University, Shanghai 200444, China

†fanhaojia@shu.edu.cn \*renwei@shu.edu.cn

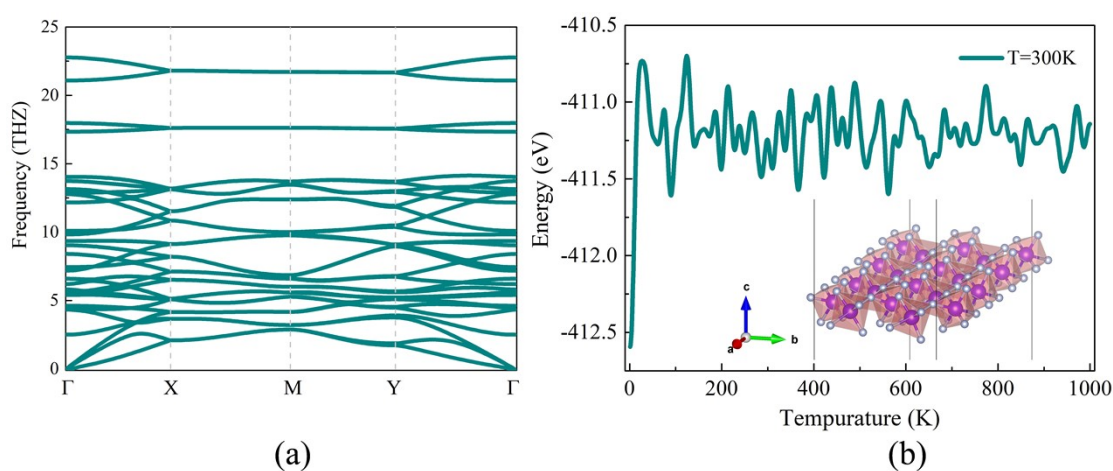

Figure S1 (a) The phonon spectra of the MnF<sub>4</sub> monolayer. (b) The evolution of energy over time at T=300 K from molecular dynamics simulations of MnF<sub>4</sub> monolayer.

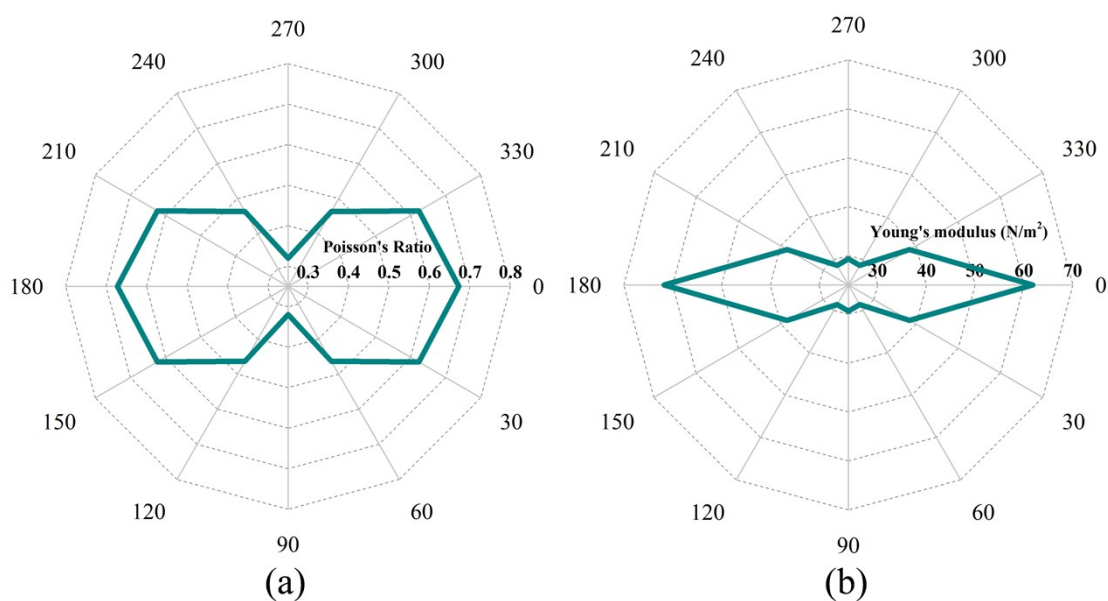

Figure S2 The angular dependence of (a) Young's modulus and (b) Poisson's ratio of the MnF<sub>4</sub> monolayer. The zero degree corresponds to *a*-axis.

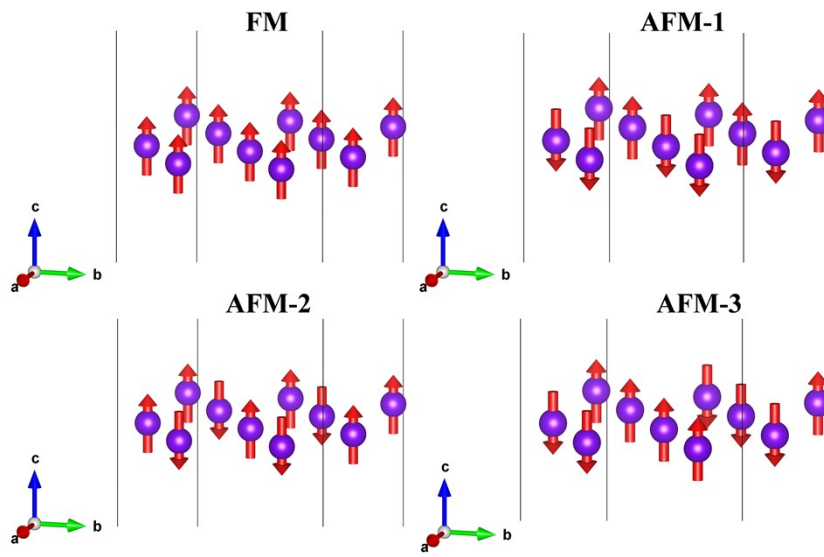

Figure S3 Four magnetic configurations of MnF<sub>4</sub> monolayer. The arrows along *c*-axis and *-c*-axis represent spin up and spin down moments respectively.

Table S1 The calculated elastic constants (N/m) of the MnF<sub>4</sub> monolayer.

| System                        | $C_{11}$ | $C_{12}$ | $C_{22}$ | $C_{66}$ |
|-------------------------------|----------|----------|----------|----------|
| MnF <sub>4</sub><br>monolayer | 78.626   | 25.096   | 37.337   | 9.957    |

Table S2 The relative energy ( $E_{\text{FM}}-E_{\text{AFM}i=1-3}$ ) of four different configurations of  $\text{MnF}_4$  monolayer as a function of carrier density.

| Carrier density | FM (meV) | AFM1(meV) | AFM2(meV) | AFM3(meV) |
|-----------------|----------|-----------|-----------|-----------|
| -0.20e          | 0.000    | -6.808    | -22.188   | -6.908    |
| -0.15e          | 0.000    | -7.302    | -21.297   | -7.9.00   |
| -0.10e          | 0.000    | -0.002    | -8.900    | -0.0152   |
| -0.05e          | 0.000    | 13.330    | 9.29432   | 11.595    |
| 0               | 0.000    | 25.550    | 26.341    | 35.800    |
| 0.05e           | 0.000    | 25.207    | 17.740    | 22.105    |
| 0.10e           | 0.000    | -16.786   | -23.308   | -17.887   |
| 0.15e           | 0.000    | -55.737   | -65.228   | -56.838   |
| 0.20e           | 0.000    | -105.708  | -118.164  | -106.903  |

Table S3 The relative energy ( $E_{\text{FM}}-E_{\text{AFM}i=1-3}$ ) of four different configurations of  $\text{MnF}_4$  monolayer as a function of biaxial strains.

| Strain | FM    | AFM1     | AFM2     | AFM3     |
|--------|-------|----------|----------|----------|
| -4%    | 0.000 | -752.450 | -747.718 | -752.554 |
| -3%    | 0.000 | -371.088 | -367.578 | -372.345 |
| -2%    | 0.000 | -97.685  | -96.102  | -97.886  |
| -1%    | 0.000 | 182.796  | 179.453  | 182.555  |
| 0%     | 0.000 | 213.717  | 210.526  | 213.656  |
| +1%    | 0.000 | 190.772  | 184.790  | 190.972  |
| +2%    | 0.000 | 126.498  | 122.143  | 126.500  |
| +3%    | 0.000 | 5.05845  | 1.57518  | 5.05491  |
| +4%    | 0.000 | -229.495 | -233.188 | -229.499 |
